# Supplementary material for: Multiple-Pathway Synergy Alters Steroidogenesis and Spermatogenesis in Response to an Immunocastration Vaccine in Goat
Source: MDPI journal article supplement (doi:10.3390/cells13010006), 2023-12-20
Supplement: s1 [file s1]

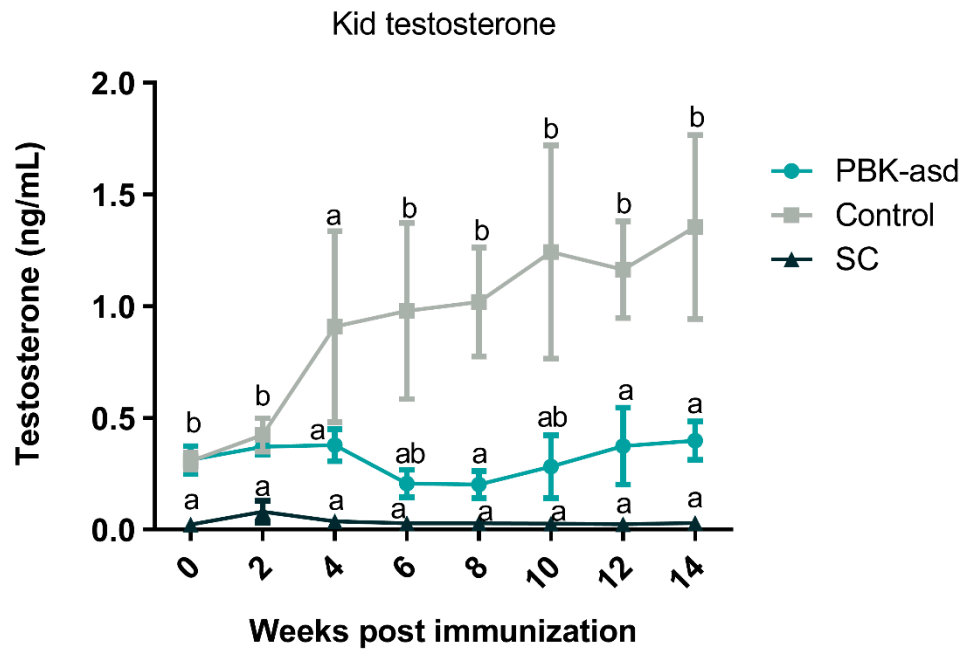

**Supplementary Figure S1** Effect of PBK-asd DNA vaccine on testosterone of Yiling goats.

The mean  $\pm$  SEM serum testosterone hormone concentration in kid goats immunized with PBK-asd (n=5), surgically castrated (n=5), and control group (n=5), respectively. Different superscript letter among weeks within a treatment group indicates significant difference at  $p < 0.05$ .

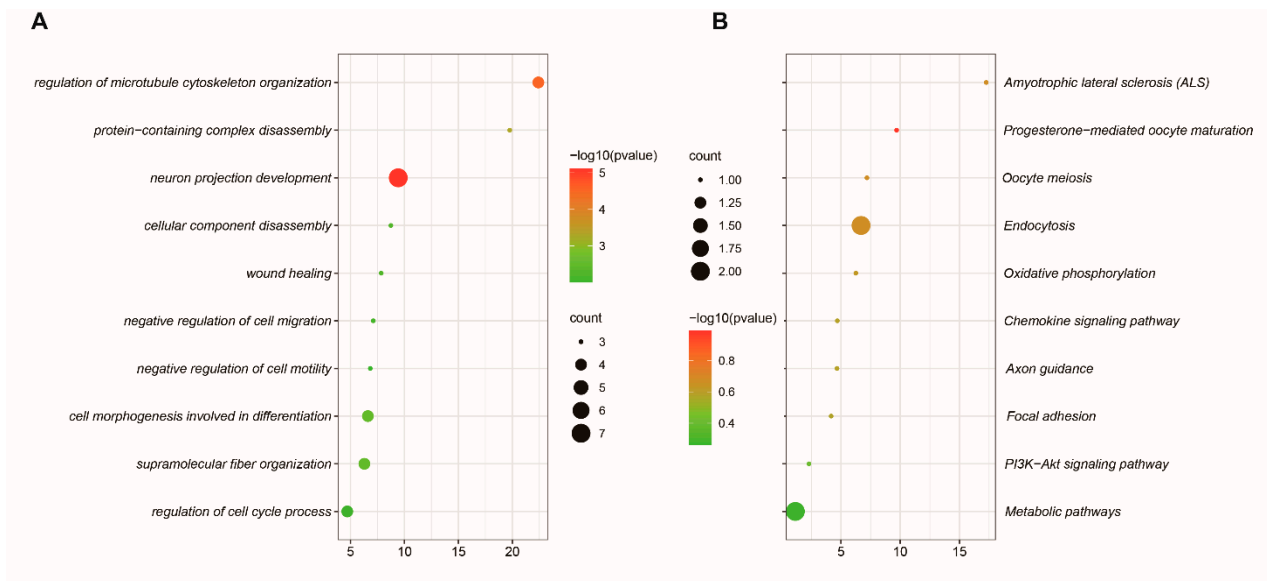

**Supplementary Figure S2.** Functional enrichment of DEG in buck groups. **A** The 10 items of GO enrichment in biological process. **B** The 10 items of KEGG pathway enrichment.

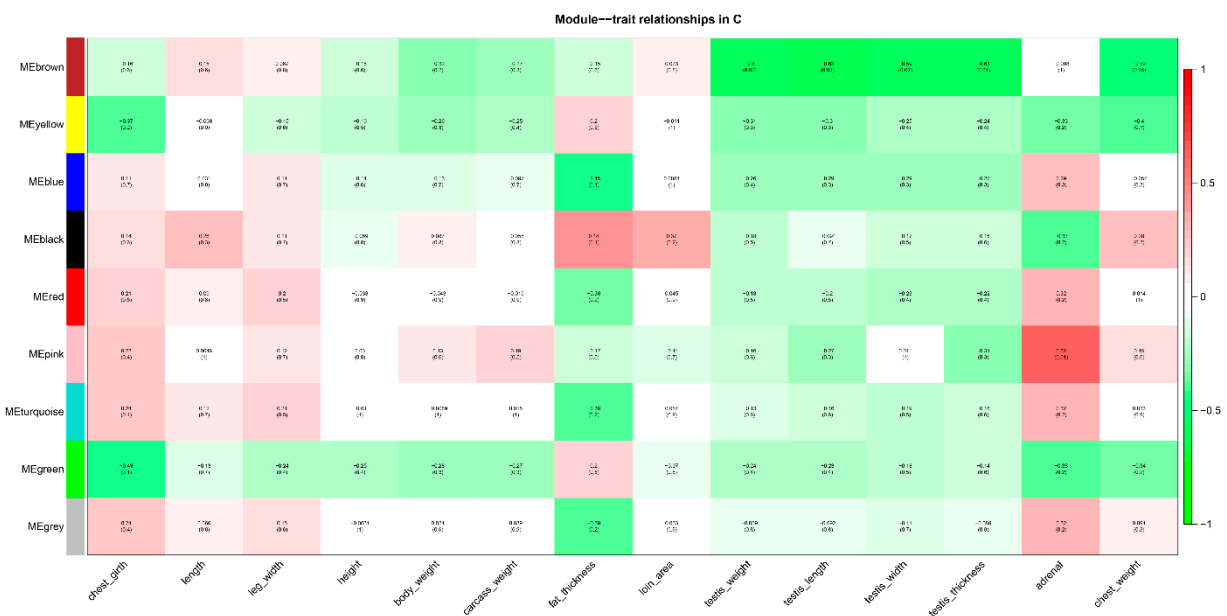

**Supplementary Figure S3** The ME values in control group were correlated with phenotype traits. Each row in the table corresponds to a consensus module, and each column to a trait. Within each table cell, upper values represent correlation coefficients between ME and the variable, while lower values in brackets correspond to Student's asymptotic *p*-value.

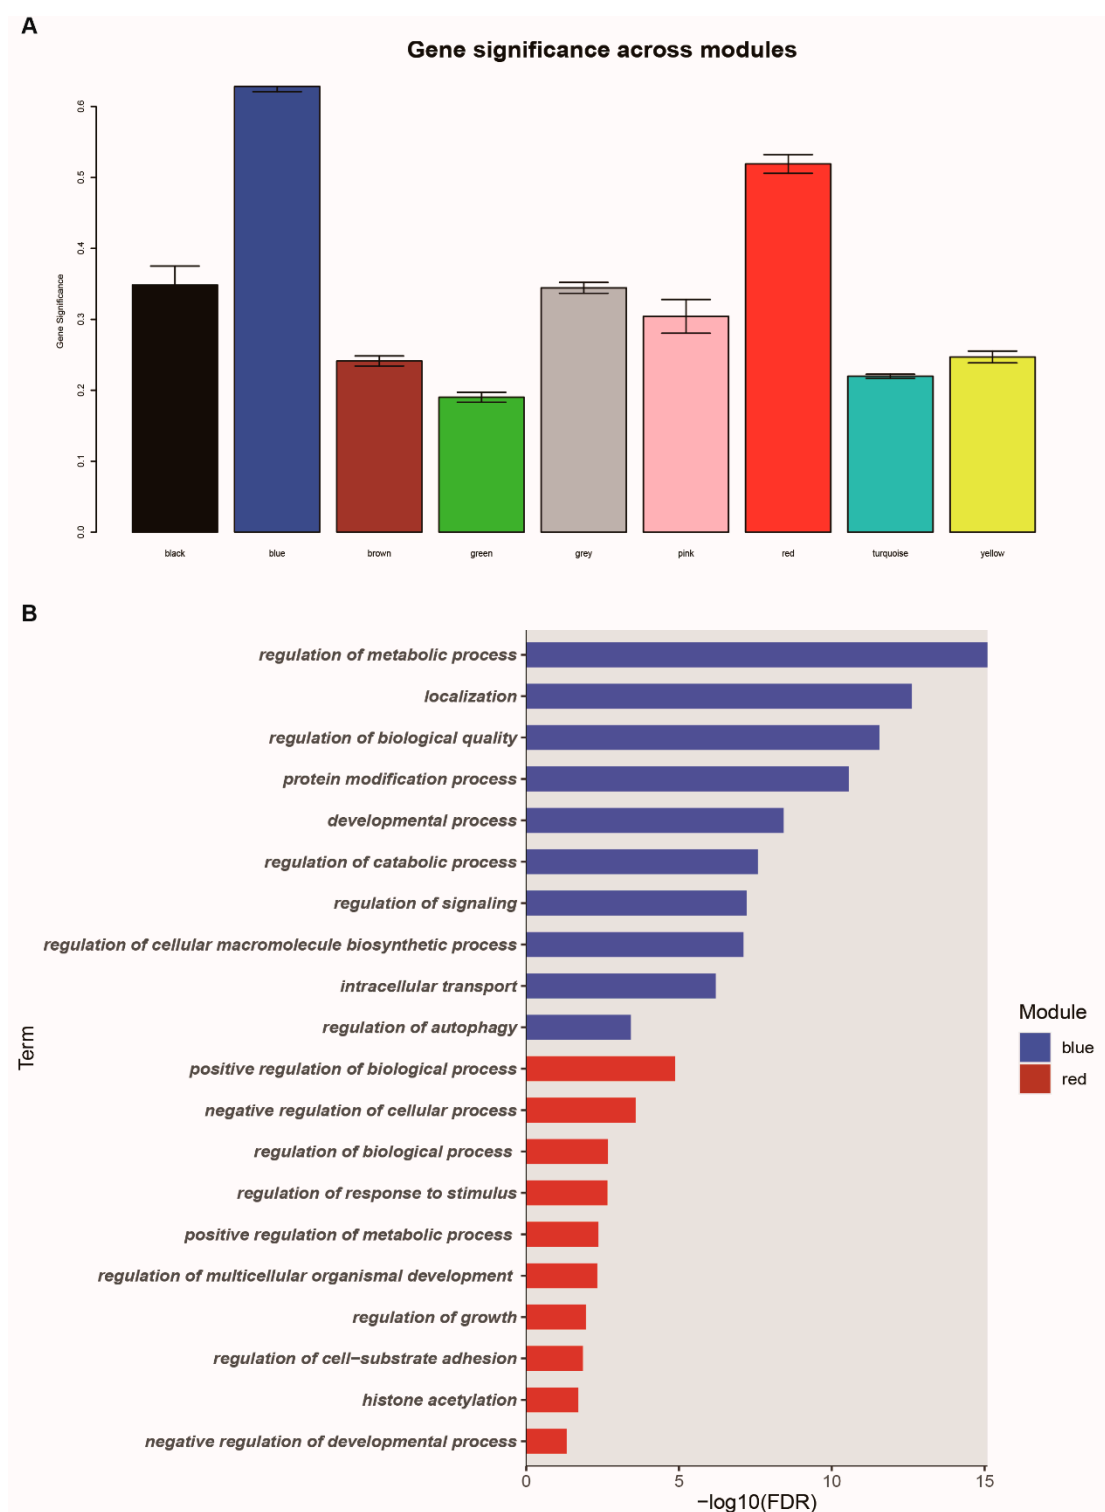

**Supplementary Figure S4** Gene significance (GS) across module and functional enrichment. **A** GS of testis weight in each module. **B** Summary of Gene Ontology (GO)

analysis present under biological process of red and blue modules.

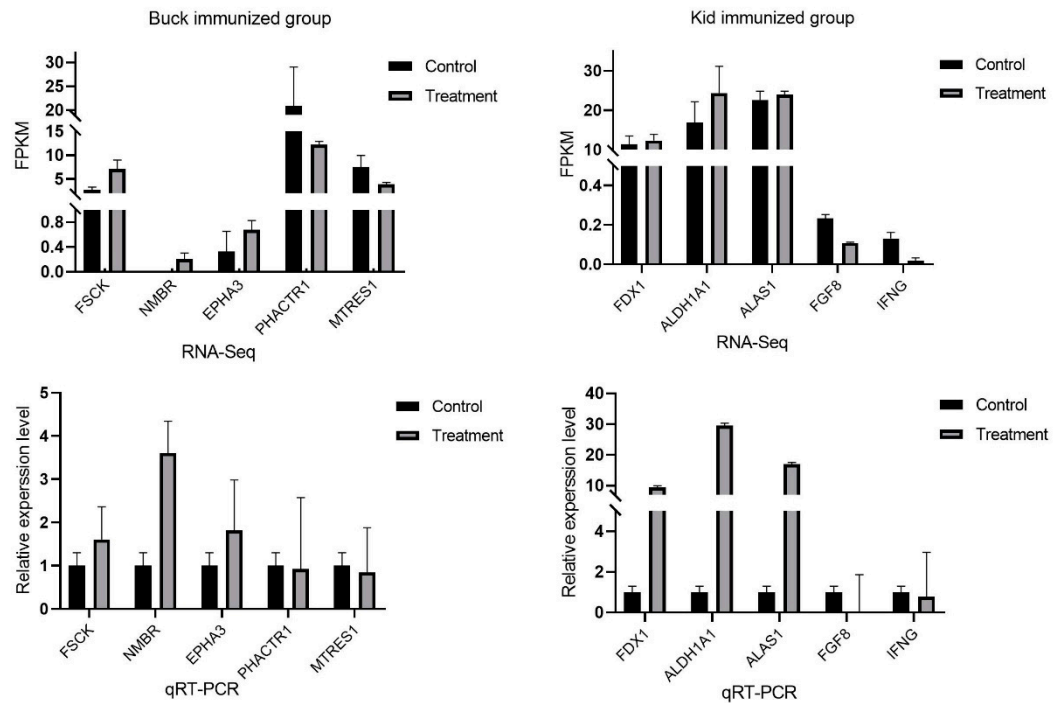

**Supplementary Figure S5.** Validation of transcriptome analysis results using qPCR analysis. The goat  $\beta$ -actin gene was used as reference gene. Data are shown as mean  $\pm$  SD (n=3).

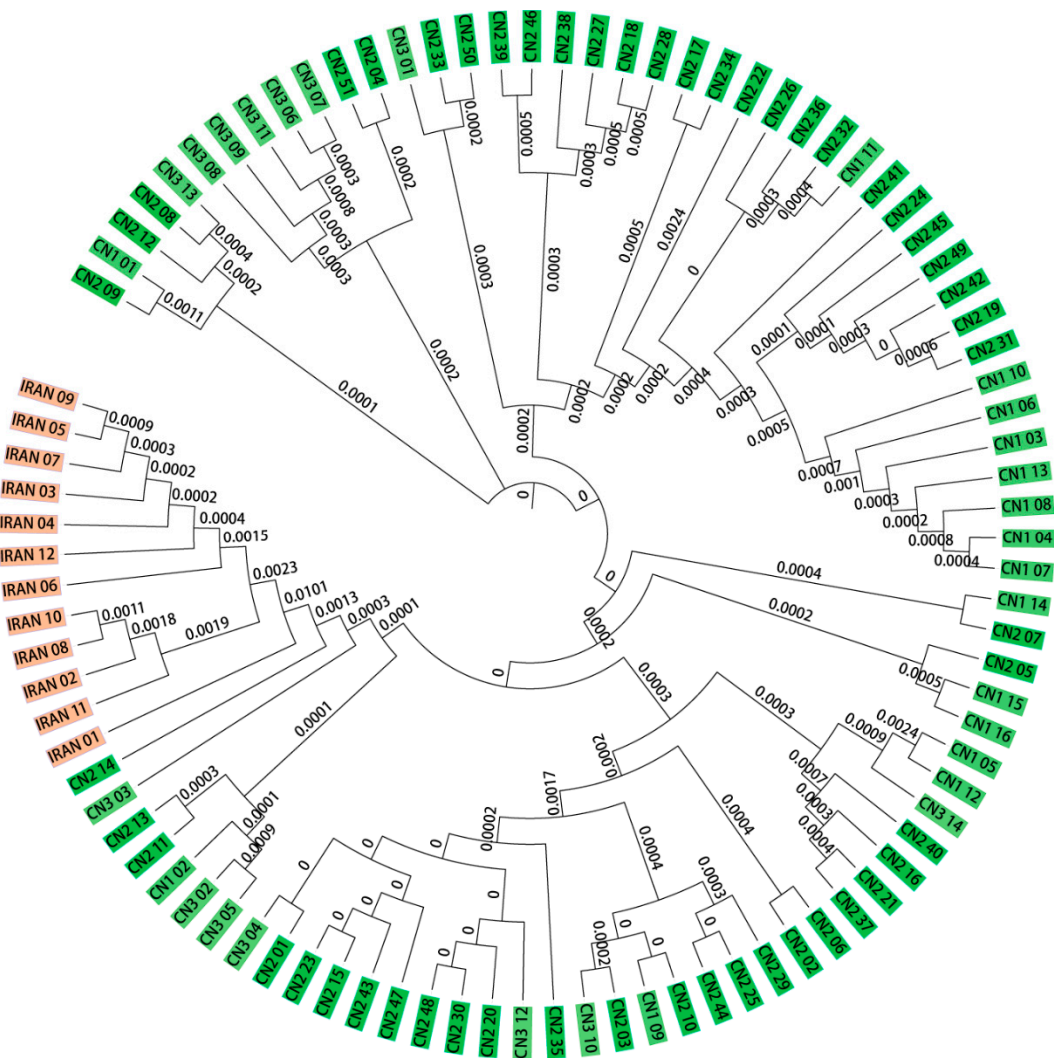

**Supplementary Figure S6** The Neighbor-Joining phylogenetic tree of domestic and wild goats based on complete mitochondrial DNA sequences. Note: The green labels represent domestic goats and the orange labels represent wild goats. The values refer to genetic distance.

**Supplement Table S1.** Primers used for quantitative reverse transcriptase PCR for goat.

| Gene           | Gene accession number | Bank<br>Primer sequence (5'-3')                     | Product length (bp) | Annealing temperature (°C) |
|----------------|-----------------------|-----------------------------------------------------|---------------------|----------------------------|
| <i>EPHA3</i>   | XM_005674802          | F: GCTTGTCGACCGGGTTTCTA<br>R: GGGTCTTTGTCTGCTCGGAA  | 137                 | 60                         |
| <i>FCSK</i>    | XM_018061676          | F: GGGGTTGATTGGACGGTCAT<br>R: TGGAAGACCTCAACGCTGTC  | 62                  | 60                         |
| <i>NMBR</i>    | XM_005684853          | F: GCAGCTTGGATAATGGCAGC<br>R: TCATCCGTCTGAGGGTAGGG  | 55                  | 60                         |
| <i>PHACTR1</i> | XM_018039147          | F: GACGCTCAGGACTATGACCG<br>R: TCCTTCCGAATGGCAGCTTT  | 80                  | 60                         |
| <i>MTRES1</i>  | XM_018053106          | F: GACTAGTGTGAGACTGCCCCG<br>R: AGAGTCCAGTCCAGGCATCT | 59                  | 60                         |
| <i>ALDH1A1</i> | XM_005683753          | F: CAAACCAGCAGAGCAAACCC<br>R: CGATCCTGTGAAGGCCACTT  | 166                 | 60                         |
| <i>FDX1</i>    | XM_018059813          | F: ACAGATAGATCGCGGTTGGG<br>R: CATCAGACACGGCATCAGGT  | 88                  | 60                         |
| <i>ALAS1</i>   | XM_005695886          | F: AACGTGAAGCTCATGAGGCA<br>R: AACGTGAAGCTCATGAGGCA  | 71                  | 55                         |
| <i>FGF8</i>    | XM_018041115          | F: TCGAGTTCGAGGAGCTGAGA<br>R: TTCTGCAGGGCCGTGTAATT  | 138                 | 60                         |
| <i>IFNG</i>    | NM_001285682          | F: TTCCGGTGGATGATCTGCAG<br>R: TACATTGATGCTCTCCGGCC  | 139                 | 59                         |

|                |           |                         |     |    |
|----------------|-----------|-------------------------|-----|----|
| <i>β-actin</i> | NM_001314 | F: GTCACCAACTGGGACGACAT | 132 | 60 |
|                | 342.1     | R: CATCTTCTCACGGTTGGCCT |     |    |

**Supplement Table S2.** Sample number and distribution of domestic and wild goats used in this study.

| Population                     | Distribution          | Sample number |
|--------------------------------|-----------------------|---------------|
| <b>Domestic goats</b>          |                       |               |
| Yiling goat                    | Hubei, China          | 35            |
| Inner Mongolia cashmere goat   | Inner Mongolia, China | 3             |
| Wuzhu Muqinbai goat            | Inner Mongolia, China | 1             |
| Xinjiang goat                  | Xinjiang, China       | 2             |
| Yimeng black goat              | Shandong, China       | 1             |
| Liaoning cashmere goat         | Liaoning, China       | 1             |
| Chengde goat (non-mountainous) | Hebei, China          | 1             |
| Zhongwei goat                  | Ningxia, China        | 1             |
| Jining gray goat               | Shandong, China       | 1             |
| Laiwu black goat               | Shandong, China       | 1             |
| Luliang black goat             | Shanxi, China         | 1             |
| Caidam goat                    | Qinghai, China        | 1             |
| Jianza goat                    | Qinghai, China        | 6             |
| Chengdu goat                   | Sichuan, China        | 1             |
| Jianchang black goat           | Sichuan, China        | 1             |
| Shaannan white goat            | Shaanxi, China        | 1             |
| Anhui white goat               | Anhui, China          | 1             |
| Yaoshan white goat             | Henan, China          | 1             |
| Matou goat                     | Hubei, China          | 1             |

|                               |                  |    |
|-------------------------------|------------------|----|
| Xiangdong black goat          | Hunan, China     | 1  |
| Yvdong black goat             | Chongqing, China | 1  |
| Maguan goat (non-mountainous) | Yunan, China     | 1  |
| Guishan goat                  | Yunan, China     | 1  |
| Guizhou black goat            | Guizhou, China   | 1  |
| Longlin goat                  | Guangxi, China   | 6  |
| Leizhou goat                  | Hainan, China    | 1  |
| Tibet goat                    | Tibet, China     | 8  |
| <b>Wild goat</b>              |                  |    |
| Iranian wild goat             | Iran             | 12 |

---

**Supplementary Table S3. Summary of Yiling goat sample information and sequencing quality.**

| Sample   | Raw reads | Clean reads | Raw base (Gb) | Clean base (Gb) | Effective rate (%) | Fault tolerance rate (%) | Q20 (%) | Q30 (%) | GC content (%) |
|----------|-----------|-------------|---------------|-----------------|--------------------|--------------------------|---------|---------|----------------|
| Yiling01 | 120796083 | 119775630   | 36.24         | 35.93           | 99.16              | 0.03                     | 97.31   | 92.66   | 44.35          |
| Yiling02 | 129627341 | 128525403   | 38.89         | 38.56           | 99.15              | 0.03                     | 97.38   | 92.86   | 44.56          |
| Yiling03 | 113911264 | 112878313   | 34.17         | 33.86           | 99.09              | 0.03                     | 97.26   | 92.56   | 45.15          |
| Yiling04 | 102886679 | 102076406   | 30.87         | 30.62           | 99.21              | 0.03                     | 97.18   | 92.22   | 44.83          |
| Yiling05 | 128846305 | 127781316   | 38.65         | 38.33           | 99.17              | 0.03                     | 97.42   | 92.91   | 44.41          |
| Yiling06 | 107339769 | 105893721   | 32.20         | 31.77           | 98.65              | 0.03                     | 97.09   | 92.35   | 46.55          |
| Yiling07 | 140889045 | 139189156   | 42.27         | 41.76           | 98.79              | 0.03                     | 97.06   | 92.28   | 47.10          |
| Yiling08 | 125236049 | 123809408   | 37.57         | 37.14           | 98.86              | 0.03                     | 97.24   | 92.66   | 46.87          |
| Yiling09 | 124264744 | 122896523   | 37.28         | 36.87           | 98.90              | 0.03                     | 97.10   | 92.31   | 46.06          |
| Yiling10 | 148525901 | 147056391   | 44.56         | 44.12           | 99.01              | 0.03                     | 96.53   | 91.11   | 45.95          |
| Yiling11 | 88474795  | 87884241    | 26.54         | 26.37           | 99.33              | 0.03                     | 96.73   | 91.23   | 44.89          |
| Yiling12 | 112723743 | 111682321   | 33.82         | 33.50           | 99.08              | 0.03                     | 96.96   | 91.90   | 46.13          |
| Yiling13 | 115615196 | 114507748   | 34.68         | 34.35           | 99.04              | 0.03                     | 96.41   | 90.78   | 45.30          |

|          |           |           |       |       |       |      |       |       |       |
|----------|-----------|-----------|-------|-------|-------|------|-------|-------|-------|
| Yiling14 | 121107473 | 119891144 | 36.33 | 35.97 | 99.00 | 0.03 | 96.33 | 90.67 | 45.17 |
| Yiling15 | 97054410  | 95787629  | 29.12 | 28.74 | 98.69 | 0.03 | 96.33 | 90.77 | 47.79 |
| Yiling16 | 117771504 | 116949429 | 35.33 | 35.08 | 99.30 | 0.03 | 97.04 | 92.00 | 44.41 |
| Yiling17 | 122730073 | 121887299 | 36.82 | 36.57 | 99.31 | 0.03 | 96.98 | 91.91 | 44.58 |
| Yiling18 | 130319000 | 129279114 | 39.10 | 38.78 | 99.20 | 0.03 | 97.11 | 92.20 | 45.79 |
| Yiling19 | 115051285 | 113348809 | 34.52 | 34.00 | 98.52 | 0.03 | 96.05 | 90.22 | 47.31 |
| Yiling20 | 121221790 | 120256405 | 36.37 | 36.08 | 99.20 | 0.03 | 97.06 | 92.13 | 45.64 |
| Yiling21 | 99238711  | 98272658  | 29.77 | 29.48 | 99.03 | 0.03 | 96.57 | 91.13 | 45.67 |
| Yiling22 | 113162626 | 112139136 | 33.95 | 33.64 | 99.10 | 0.03 | 96.44 | 90.82 | 45.41 |
| Yiling23 | 115482258 | 114164253 | 34.64 | 34.25 | 98.86 | 0.03 | 96.53 | 91.09 | 46.8  |
| Yiling24 | 119504061 | 118632909 | 35.85 | 35.59 | 99.27 | 0.03 | 97.06 | 92.03 | 44.99 |
| Yiling25 | 121270175 | 119963785 | 36.38 | 35.99 | 98.92 | 0.03 | 97.40 | 93.12 | 46.36 |
| Yiling26 | 125062097 | 123999705 | 37.52 | 37.20 | 99.15 | 0.03 | 96.97 | 91.91 | 44.98 |
| Yiling27 | 118220668 | 116802484 | 35.47 | 35.04 | 98.80 | 0.03 | 96.95 | 91.96 | 46.27 |
| Yiling28 | 138511857 | 136908055 | 41.55 | 41.07 | 98.84 | 0.03 | 97.53 | 93.23 | 44.84 |
| Yiling29 | 138858553 | 137480113 | 41.66 | 41.24 | 99.01 | 0.03 | 97.35 | 92.81 | 44.89 |
| Yiling30 | 144182535 | 142576854 | 43.25 | 42.77 | 98.89 | 0.03 | 97.50 | 93.23 | 46.27 |

|          |           |           |       |       |       |      |       |       |       |
|----------|-----------|-----------|-------|-------|-------|------|-------|-------|-------|
| Yiling31 | 157495624 | 155312146 | 47.25 | 46.59 | 98.61 | 0.03 | 97.41 | 93.06 | 46.23 |
| Yiling32 | 133828306 | 132883044 | 40.15 | 39.86 | 99.29 | 0.03 | 96.78 | 91.44 | 44.14 |
| Yiling33 | 119329016 | 118346680 | 35.80 | 35.50 | 99.18 | 0.03 | 97.52 | 93.27 | 45.02 |
| Yiling34 | 134688639 | 133415434 | 40.41 | 40.02 | 99.05 | 0.03 | 97.40 | 92.88 | 45.03 |
| Yiling35 | 120983694 | 119889757 | 36.30 | 35.97 | 99.10 | 0.03 | 97.55 | 93.16 | 44.22 |

---

**Supplementary Table S4. Information on the goat whole genome sequencing data used in this study.**

| Population                   | Name   | Entry number | Size<br>(Gb) | Population                       | Name   | Entry<br>number | Size<br>(Gb) | Population                       | Name     | Entry number | Size<br>(Gb) |
|------------------------------|--------|--------------|--------------|----------------------------------|--------|-----------------|--------------|----------------------------------|----------|--------------|--------------|
| <b>Downloaded<br/>(wild)</b> |        |              |              | <b>Downloaded<br/>(domestic)</b> |        |                 |              | <b>This study<br/>(domestic)</b> |          |              |              |
| Iranian wild<br>goat         | IRCA01 | ERR340348    | 32.4         | Inner                            | CN2_07 | SRR5803189      | 41.1         | Yiling goat                      | Yiling01 | SRR16288442  | 35.9         |
|                              | IRCA03 | ERR340328    | 19.5         | Mongolia                         | CN2_08 | SRR5803186      | 39.9         |                                  | Yiling02 | SRR16288441  | 38.6         |
|                              | IRCA04 | ERR340343    | 21.7         | cashmere<br>goat                 | CN2_09 | SRR5803187      | 35.2         |                                  | Yiling03 | SRR16288430  | 33.9         |
|                              | IRCA05 | ERR340340    | 36.5         | Shaannan<br>white goat           | CN2_10 | SRR5803178      | 66.8         |                                  | Yiling04 | SRR16288419  | 30.6         |
|                              | IRCA07 | ERR340344    | 33.8         | Wuzhu<br>Muqinbai<br>goat        | CN2_11 | SRR5803197      | 35.5         |                                  | Yiling05 | SRR16288413  | 38.3         |

|                        |                     |           |            |                                       |              |            |            |          |             |             |
|------------------------|---------------------|-----------|------------|---------------------------------------|--------------|------------|------------|----------|-------------|-------------|
| Download<br>(domestic) | IRCA08              | ERR340334 | 37.6       | Xinjiang goat                         | CN2_12       | SRR5803194 | 38.5       | Yiling06 | SRR16288412 | 31.8        |
|                        | IRCA09              | ERR340345 | 35.4       |                                       | CN2_13       | SRR5803181 | 35.8       | Yiling07 | SRR16288411 | 41.8        |
|                        | IRCA10              | ERR340338 | 34.2       | Yaoshan<br>white goat                 | CN2_14       | SRR5803230 | 36.6       | Yiling08 | SRR16288410 | 37.1        |
|                        | IRCA11              | ERR340342 | 19.0       | Yvdong black<br>goat                  | CN2_50       | SRR5803172 | 28.4       | Yiling09 | SRR16288409 | 36.9        |
|                        | IRCA13              | ERR340331 | 34.6       | Zhongwei<br>goat                      | CN2_51       | SRR5803182 | 34.4       | Yiling10 | SRR16288408 | 44.1        |
|                        | IRCA14              | ERR340330 | 37.4       | Chengde goat<br>(non-<br>mountainous) | CN3_01       | SRR5803183 | 30.7       | Yiling11 | SRR16288440 | 26.4        |
|                        | IRCA16              | ERR340336 | 19.3       | Jining gray<br>goat                   | CN3_02       | SRR5803177 | 35.4       | Yiling12 | SRR16288439 | 33.5        |
|                        |                     |           |            | Laiwu black<br>goat                   | CN3_03       | SRR5803215 | 39.2       | Yiling13 | SRR16288438 | 34.4        |
|                        | Anhui white<br>goat | CN1_01    | SRR5803168 | 38.5                                  | Leizhou goat | CN3_04     | SRR5803231 | 40.9     | Yiling14    | SRR16288437 |

|             |        |            |      |                              |        |            |       |          |             |      |
|-------------|--------|------------|------|------------------------------|--------|------------|-------|----------|-------------|------|
| Caidam goat | CN1_02 | SRR5803179 | 37.3 | Liaoning<br>cashmere<br>goat | CN3_05 | SRR5803180 | 40.8  | Yiling15 | SRR16288436 | 28.7 |
| Jianza goat | CN1_03 | SRR5803214 | 38.1 | Longlin goat                 | CN3_06 | SRR5803158 | 98.0  | Yiling16 | SRR16288435 | 35.1 |
|             | CN1_04 | SRR5803213 | 39.4 |                              | CN3_07 | SRR5803163 | 142.1 | Yiling17 | SRR16288434 | 36.6 |
|             | CN1_05 | SRR5803212 | 39.1 |                              | CN3_08 | SRR5803164 | 65.1  | Yiling18 | SRR16288433 | 38.8 |
|             | CN1_06 | SRR5803205 | 40.0 |                              | CN3_09 | SRR5803161 | 74.3  | Yiling19 | SRR16288432 | 34.0 |
|             | CN1_07 | SRR5803209 | 38.3 |                              | CN3_10 | SRR5803162 | 67.5  | Yiling20 | SRR16288431 | 36.1 |
|             | CN1_08 | SRR5803229 | 39.2 |                              | CN3_11 | SRR5803165 | 91.5  | Yiling21 | SRR16288429 | 29.5 |
| Tibet goat  | CN1_09 | SRR5803196 | 38.7 | Matou goat                   | CN3_12 | SRR5803171 | 48.8  | Yiling22 | SRR16288428 | 33.6 |
|             | CN1_10 | SRR5803195 | 38.6 | Xiangdong<br>black goat      | CN3_13 | SRR5803170 | 41.1  | Yiling23 | SRR16288427 | 34.3 |
|             | CN1_11 | SRR5803203 | 38.6 | Yimeng black<br>goat         | CN3_14 | SRR5803206 | 40.0  | Yiling24 | SRR16288426 | 35.6 |
|             | CN1_12 | SRR5803202 | 40.0 |                              |        |            |       | Yiling25 | SRR16288425 | 36.0 |
|             | CN1_13 | SRR5803201 | 39.1 |                              |        |            |       | Yiling26 | SRR16288424 | 37.2 |
|             | CN1_14 | SRR5803159 | 37.6 |                              |        |            |       | Yiling27 | SRR16288423 | 35.0 |

|              |        |            |      |  |          |             |      |
|--------------|--------|------------|------|--|----------|-------------|------|
|              | CN1_15 | SRR5803160 | 50.5 |  | Yiling28 | SRR16288422 | 41.1 |
|              | CN1_16 | SRR5803157 | 41.7 |  | Yiling29 | SRR16288421 | 41.2 |
| Chengdu      | CN2_01 | SRR5803228 | 38.4 |  | Yiling30 | SRR16288420 | 42.8 |
| goat         |        |            |      |  |          |             |      |
| Guishan goat | CN2_02 | SRR5803184 | 35.8 |  | Yiling31 | SRR16288418 | 46.6 |
| Guizhou      | CN2_03 | SRR5803169 | 40.5 |  | Yiling32 | SRR16288417 | 39.9 |
| black goat   |        |            |      |  |          |             |      |
| JianChang    | CN2_04 | SRR5803233 | 39.5 |  | Yiling33 | SRR16288416 | 35.5 |
| black goat   |        |            |      |  |          |             |      |
| Luliang      | CN2_05 | SRR5803176 | 43.6 |  | Yiling34 | SRR16288415 | 40.0 |
| black goat   |        |            |      |  |          |             |      |
| Maguan goat  | CN2_06 | SRR5803185 | 59.5 |  | Yiling35 | SRR16288414 | 36.0 |
| without      |        |            |      |  |          |             |      |
| Angle        |        |            |      |  |          |             |      |

---

**Supplementary Table S5.** Gene list intersection between RNA-seq and WGS analysis.

| Gene ID            | Gene symbol   | Ktotal   | Kwithin  | GO | log2FC (kid) | P value (kid) | Expression level                           |
|--------------------|---------------|----------|----------|----|--------------|---------------|--------------------------------------------|
| ENSCHIG00000020738 | <i>FGF9</i>   | 10426.45 | 134.4661 | 5  | 8.129026592  | 0.0000678     | Positive selection gene and DEseq          |
| ENSCHIG00000019449 | <i>SPIRE2</i> | 10315.8  | 1036.03  | 3  | -0.77240979  | 0.657520672   | Positive selection gene and blue<br>module |
| ENSCHIG00000022689 | <i>HBEGF</i>  | 9942.656 | 924.4125 | 5  | 2.786824904  | 0.038100061   | Positive selection gene and DEseq          |
| ENSCHIG00000016855 | <i>FST</i>    | 9561.124 | 144.7799 | 6  | 5.22995365   | 0.023462153   | Positive selection gene and DEseq          |
| ENSCHIG00000025706 | /             | 9327.276 | 1289.693 | /  | 0.315675843  | 0.528701321   | Positive selection gene and blue<br>module |
| ENSCHIG00000010514 | <i>CNTFR</i>  | 9107.752 | 336.0197 | 3  | 2.573619922  | 0.105178386   | Positive selection gene and red module     |

|                    |                |          |          |   |             |             |                                         |
|--------------------|----------------|----------|----------|---|-------------|-------------|-----------------------------------------|
| ENSCHIG00000019574 | <i>SPINT2</i>  | 9024.999 | 1403.636 | 5 | -0.41170049 | 0.494652897 | Positive selection gene and blue module |
| ENSCHIG00000026162 | <i>TH</i>      | 8320.337 | 1624.592 | 5 | 5.84341305  | 0.002422813 | Positive selection gene and DEseq       |
| ENSCHIG00000023115 | <i>LFNG</i>    | 8074.776 | 398.6427 | 4 | 1.033803396 | 0.345061876 | Positive selection gene and red module  |
| ENSCHIG00000012744 | <i>TMEM119</i> | 8045.136 | 1084.837 | 6 | 3.213250281 | 0.03013029  | Positive selection gene and DEseq       |
| ENSCHIG00000014058 | <i>ESR1</i>    | 7928.636 | 1669.964 | 8 | 3.609312617 | 0.004774435 | Positive selection gene and DEseq       |
| ENSCHIG00000012199 | <i>WASHC5</i>  | 7103.418 | 1732.2   | 2 | 0.919589492 | 0.237829319 | Positive selection gene and blue module |
| ENSCHIG00000021357 | <i>TUBGCP6</i> | 6822.656 | 416.1157 | 1 | 0.331270454 | 0.604250306 | Positive selection gene and red module  |
| ENSCHIG00000005289 | <i>PLEKHA1</i> | 6437.164 | 1771.953 | 6 | 0.511920671 | 0.361546324 | Positive selection gene and blue module |
| ENSCHIG00000025200 | /              | 6373.439 | 499.2954 | / | 1.137799076 | 0.638910976 | Positive selection gene and red module  |
| ENSCHIG00000009831 | <i>NCAPH2</i>  | 6362.224 | 1428.043 | 3 | -0.47835359 | 0.474208492 | Positive selection gene and blue module |
| ENSCHIG00000026671 | <i>KMT2B</i>   | 6098.937 | 528.9379 | 1 | -0.13737029 | 0.787224148 | Positive selection gene and red module  |
| ENSCHIG00000006291 | /              | 5922.709 | 507.9752 | / | 1.197973204 | 0.143033428 | Positive selection gene and red module  |
| ENSCHIG00000020968 | <i>IGF2</i>    | 5452.408 | 1811.661 | 6 | 3.782886474 | 0.018219797 | Positive selection gene and DEseq       |

|                    |               |          |          |   |             |             |                                         |
|--------------------|---------------|----------|----------|---|-------------|-------------|-----------------------------------------|
| ENSCHIG00000021157 | <i>ITGA9</i>  | 3957.202 | 1689.496 | 2 | 0.631371522 | 0.408827811 | Positive selection gene and blue module |
| ENSCHIG00000025994 | <i>GREB1L</i> | 2883.777 | 1642.253 | 4 | 0.90959272  | 0.360823303 | Positive selection gene and blue module |
| ENSCHIG00000027016 | <i>TFRC</i>   | 2795.096 | 1621.542 | 5 | 1.365451201 | 0.34793867  | Positive selection gene and blue module |
| ENSCHIG00000017378 | <i>NUPR1</i>  | 2785.277 | 659.6944 | 7 | 1.239973038 | NA          | Positive selection gene and red module  |
| ENSCHIG00000008751 | <i>BIRC6</i>  | 2223.435 | 1474.577 | 3 | 0.742441141 | 0.465405614 | Positive selection gene and blue module |
| ENSCHIG00000016406 | <i>GNRH1</i>  | 2049.511 | 1407.173 | 3 | 0.56643644  | NA          | Positive selection gene and blue module |
| ENSCHIG00000018721 | <i>TIPARP</i> | 1866.982 | 1135.689 | 5 | 0.419686389 | 0.586154972 | Positive selection gene and blue module |
| ENSCHIG00000026354 | <i>ASH1L</i>  | 1800.446 | 1287.815 | 7 | 0.714224707 | 0.563616413 | Positive selection gene and blue module |
| ENSCHIG00000022287 | <i>KIT</i>    | 1700.756 | 1180.216 | 8 | -0.08929574 | 0.900112831 | Positive selection gene and blue module |

|                    |               |          |          |   |             |             |                                            |
|--------------------|---------------|----------|----------|---|-------------|-------------|--------------------------------------------|
| ENSCHIG00000021701 | <i>UBAP2L</i> | 1679.603 | 474.3126 | 2 | -0.12160224 | 0.803507938 | Positive selection gene and red module     |
| ENSCHIG00000012304 | <i>HERC4</i>  | 1240.99  | 959.4366 | 1 | 0.306485904 | 0.570249446 | Positive selection gene and blue<br>module |
| ENSCHIG00000016503 | <i>TCP1</i>   | 1071.71  | 348.345  | 2 | -0.09735723 | 0.733437526 | Positive selection gene and red module     |
| ENSCHIG00000010015 | <i>MYORG</i>  | 714.8215 | 278.8131 | 2 | -0.29566244 | 0.493457543 | Positive selection gene and blue<br>module |
| ENSCHIG00000019616 | <i>LEP</i>    | 639.2835 | 438.9353 | 8 | -0.27110208 | 0.927132382 | Positive selection gene and blue<br>module |

---
